# Supplementary material for: Rescue of NLRC5 expression restores antigen processing machinery in head and neck cancer cells lacking functional STAT1 and p53
Source: Springer Nature journal article supplement (doi:10.1007/s00262-023-03589-y), 2024-01-01
Supplement: MOESM1 [file 26635748]

Supplementary Data

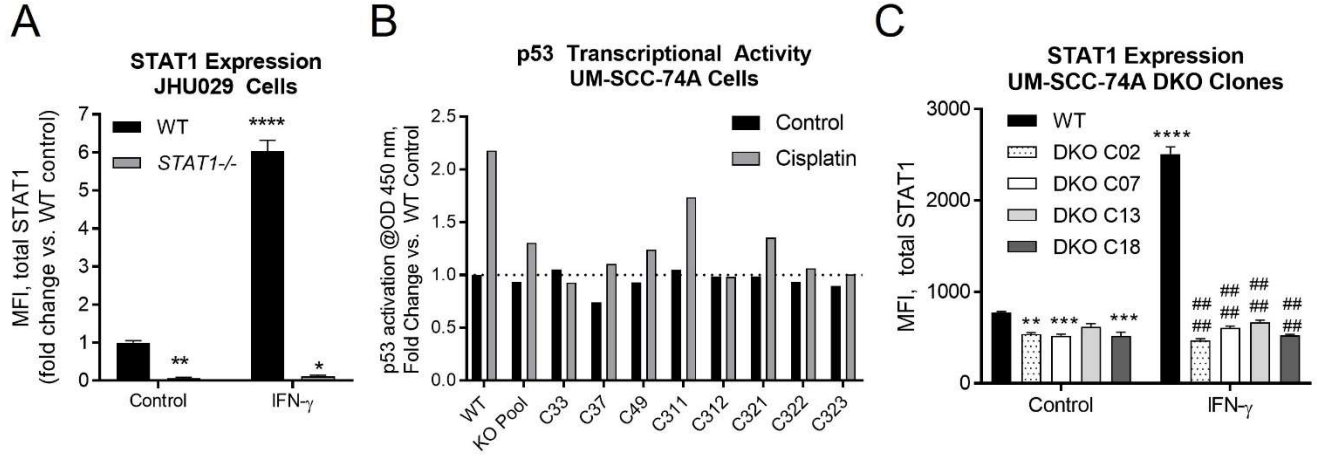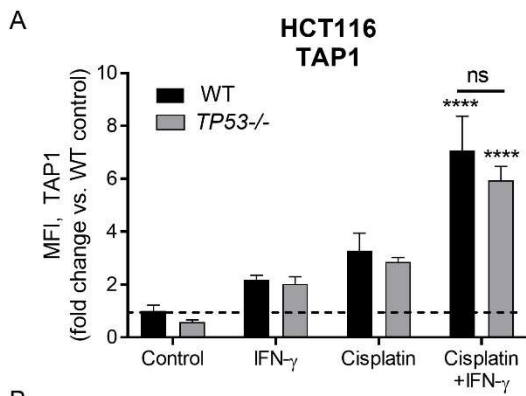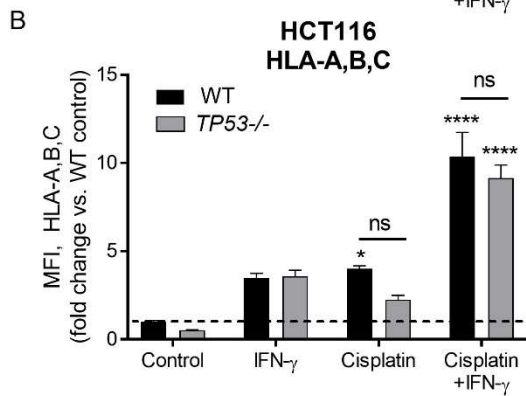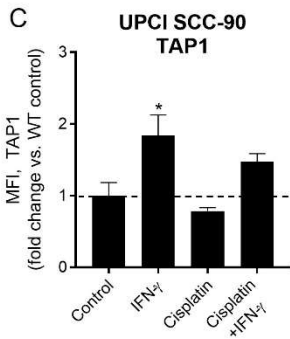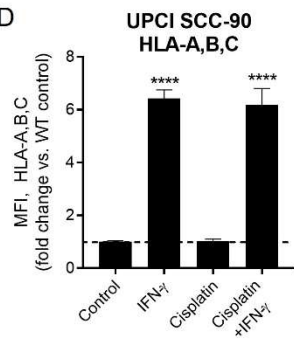

**Figure S1:** Verification of *TP53*<sup>-/-</sup> and *STAT1*<sup>-/-</sup> cells. (A) Wildtype (WT) JHU029 cells or cells from the *STAT1*<sup>-/-</sup> pool were treated with IFN- $\gamma$  (10 ng/ml) for 48 hours, then fixed, stained for intracellular STAT1, and analyzed by flow cytometry. (B) Wildtype or *TP53*<sup>-/-</sup> clones of UM-SCC-74A cells were treated with control media or cisplatin (to activate p53) for 24 hours. To verify lack of the *TP53* DNA binding domain in specific clones, a transcriptional activity assay was performed on nuclear extracts for all clones. (C) Wildtype (WT) or dual knockout (DKO; *TP53*<sup>-/-</sup> and *STAT1*<sup>-/-</sup>) clones of UM-SCC-74A cells were treated with IFN- $\gamma$  (10 ng/ml) for 48 hours, then fixed, stained for intracellular STAT1, and analyzed by flow cytometry. \**p*<0.05, \*\**p*<0.01, \*\*\**p*<0.001, \*\*\*\**p*<0.0001 versus wildtype control by two-way ANOVA with post-hoc Tukey comparison.

**Figure S2:** IFN- $\gamma$ -induced TAP1 and HLA-A,B,C expression were not impaired in other cell lines lacking functional p53 either due to knockdown (HCT116 colorectal cancer cells; A,B) or degradation by HPV E6 oncoprotein (UPCI SCC-90 oropharyngeal cancer cells; C,D). Cells were treated with IFN- $\gamma$  (10 ng/ml) or a sublethal dose of cisplatin for 48 hours, then fixed, stained for APM components, and analyzed by flow cytometry. \**p*<0.05, \*\*\*\**p*<0.0001 versus wildtype control by three-way (A, B) or two-way (C,D) ANOVA with post hoc Tukey comparisons. Results are mean + SEM, *n* = 6, combined from two independent experiments.

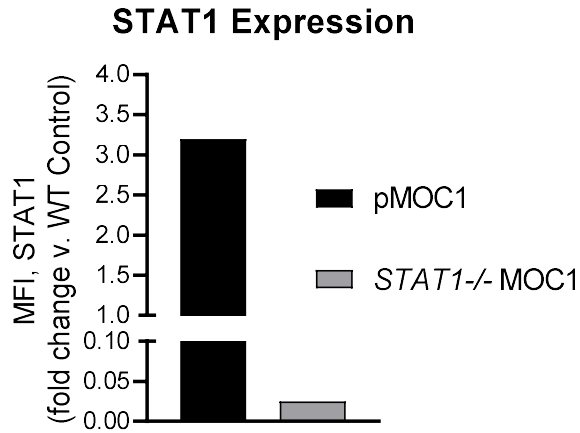

**Figure S3:** Knockout of STAT1 from mouse oral cancer (MOC1) cells was verified by flow cytometry. Cell lines were cultured with control media or interferon-gamma (10 ng/ml) for 24 hours, then fixed, permeabilized, and analyzed by flow cytometry, with values above normalized to wildtype control (= 1, not shown).

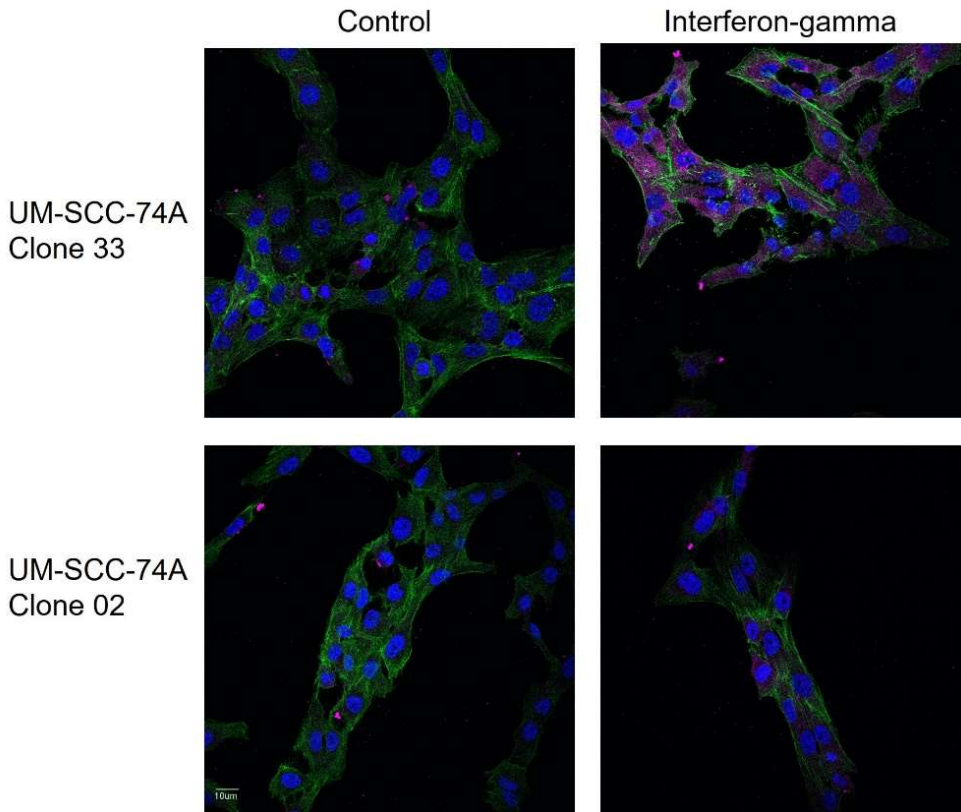

**Figure S4:** Confocal micrographs of NLRC5 expression in UM-SCC-74A clone 33 and UM-SCC-74A clone 02 (*TP53*<sup>-/-</sup>). Cells were treated with IFN- $\gamma$  (10 ng/ml) for 48 hours, then fixed, stained for NLRC5 and imaged by confocal microscopy. DAPI is blue, actin (phalloidin stain) is green, and NLRC5 is magenta.
